# Supplementary material for: Therapeutic Potential of LNP-Mediated Delivery of miR-634 for Cancer Therapy
Source: PubMed Central journal article supplement — Mol Ther Nucleic Acids. 2019 Nov 26;19:330–8. doi: 10.1016/j.omtn.2019.10.045 (PMC6938807; doi:10.1016/j.omtn.2019.10.045), 2019-11-26
Supplement: mmc1.pdf [file mmc1.pdf]

OMTN, Volume 19

## Supplemental Information

### Therapeutic Potential of LNP-Mediated Delivery of *miR-634* for Cancer Therapy

Kentaro Gokita, Jun Inoue, Hiroshi Ishihara, Kazuyuki Kojima, and Johji Inazawa

## Supplementary Figure 1

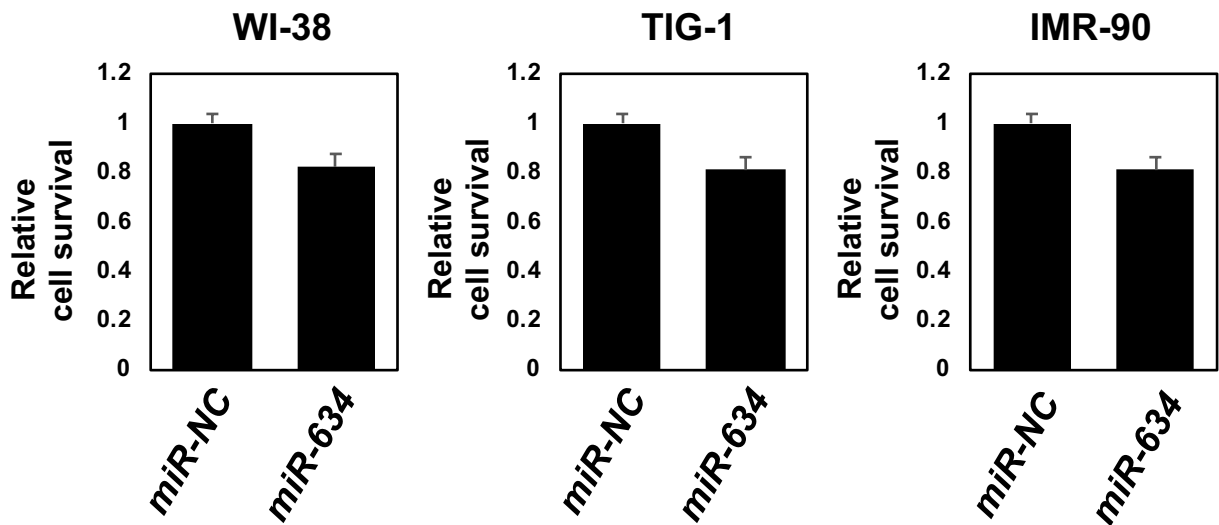

**Supplementary Figure 1. Cell survival rate in *miR-634*-transfected fibroblasts.** Normal fibroblasts (WI-38, TIG-1, and IMR-90 cells) were transfected with 20 nmol/L *miR-NC* or *miR-634*, after 3 days cell survival rate was assessed with the CV staining assay, and the results are indicated as the relative ratio compared with *miR-NC*. Bar, SD of triplicate data.

## Supplementary Figure 2

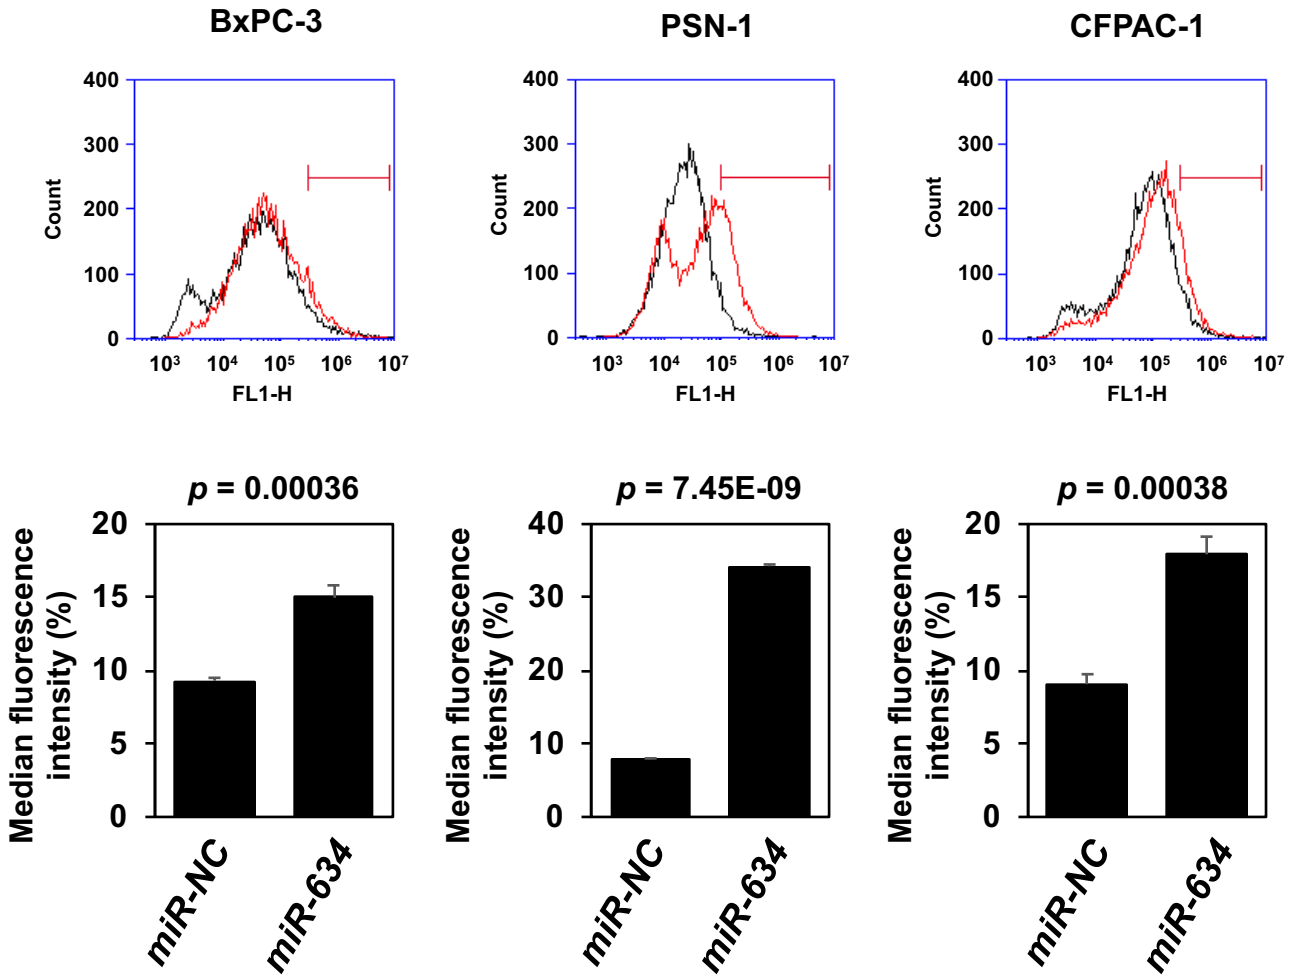

### Supplementary Figure 2. Cellular ROS detection assay.

Cells were incubated with 20  $\mu$ M of DCFDA for 30 minutes at 37°C, and fluorescence intensity was measured using flow cytometry. The median fluorescence intensity is shown in the graph (lower panel). Bar; standard deviation (SD).

## Supplementary Figure 3

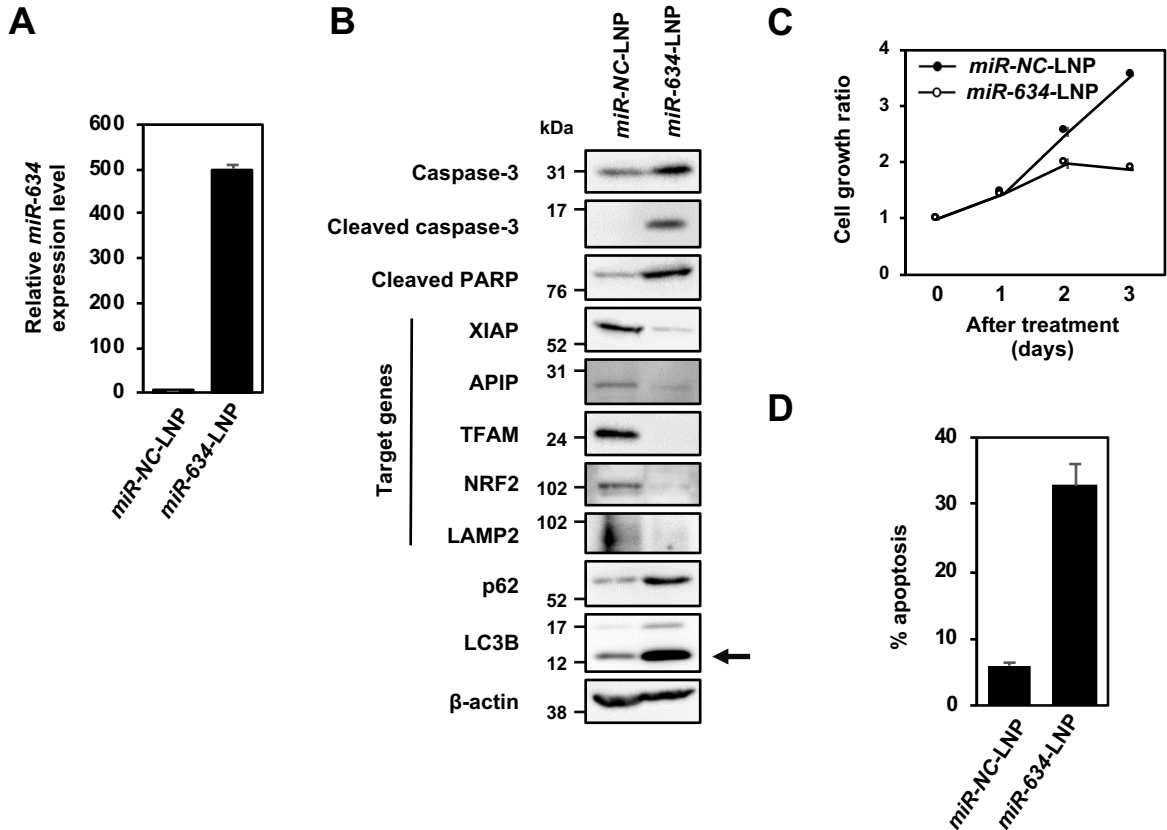

### Supplementary Figure 3. Effect of *miR-634-LNP* *in vitro*

**A.** BxPC-3 cells were cultured in the medium including *miR-634-LNP* or *miR-NC-LNP* at the concentrations of 20 nmol/L for 3 days. The expression level of *miR-634* was measured by qRT-PCR. Bar, SD.

**B.** Western blotting analysis of *miR-634*-expressing cells. Cell lysates were subjected to SDS-PAGE and immunoreacted with the indicated antibodies. For the detection of LAMP2, cell lysates were prepared under nonreducing conditions (without 2-ME). Arrow indicates the band for LC3B form-II, an autophagosome marker.

**C.** Cell growth assay. Cell growth rate was assessed with the CV staining assay, and results are reported as the relative ratio compared with day 0 (lower panels). Bar, SD of triplicate experiments. The error bars are not visualized due to too small.

**D.** FACS analysis of the apoptotic cell population. FACS analysis was performed at 3 days after transfection. Cells were collected and stained with Annexin V and propidium iodide (PI). Cell population analysis was performed using an Accuri Flow Cytometer. The percentages of apoptotic cells are indicated in each graph. Bar, SD of triplicate experiments.

## Supplementary Figure 4

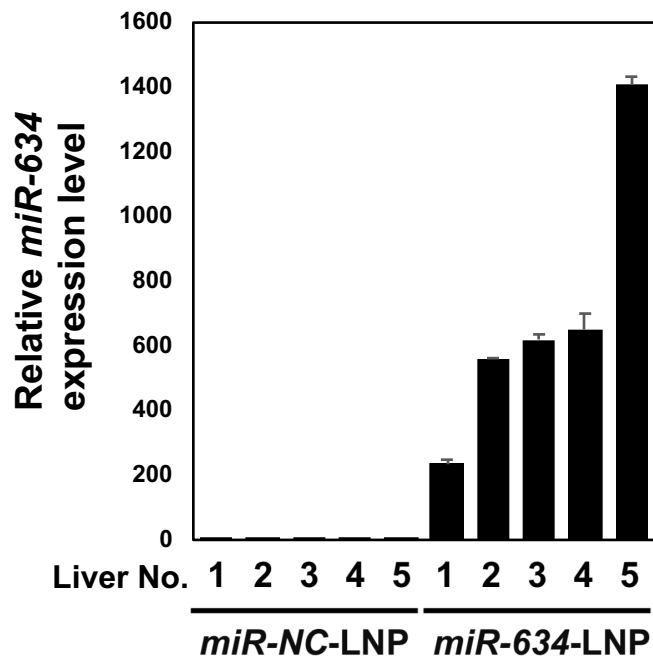

### Supplementary Figure 4. Expression analysis of *miR-634* in liver by qRT-PCR

The expression level of *miR-634* in livers from mice treated with *miR-NC-LNPs* (n=5) or *miR-634-LNPs* (n=5) was measured by qRT-PCR. Gene expression values are presented as the ratio (difference in Ct values) between *miR-634* and an internal reference, *snoRNA202*. Bar, SD.

Table S1 Sensitivity to *miR-634* in 117 cell lines of various cancer types

| Cell lines | Type          | Cell survival (%) | Cell lines | Type          | Cell survival (%) |
|------------|---------------|-------------------|------------|---------------|-------------------|
| YH-13      | Glioblastoma  | 100.3             | TTA-2      | Thyroid       | 55.8              |
| MIAPaCa-2  | Pancreas      | 99.1              | Mpanc96    | Pancreas      | 55.5              |
| KNS-42     | Glioblastoma  | 97.0              | PANC-1     | Pancreas      | 54.9              |
| KTA-2      | Thyroid       | 96.5              | KINGS-1    | Glioblastoma  | 54.6              |
| KP2        | Pancreas      | 91.7              | KP1NL      | Pancreas      | 54.2              |
| KMP8       | Pancreas      | 90.1              | CRL 1579   | Melanoma      | 53.8              |
| No. 10     | Glioblastoma  | 88.1              | Becker     | Glioblastoma  | 53.4              |
| No. 11     | Glioblastoma  | 87.2              | 697 mel    | Melanoma      | 52.8              |
| HPC-Y25    | Pancreas      | 87.0              | MMG3       | Melanoma      | 52.3              |
| KNS-89     | Glioblastoma  | 86.5              | 865 mel    | Melanoma      | 51.2              |
| KP3L       | Pancreas      | 86.0              | KTA-3      | Thyroid       | 50.7              |
| CAPAN-1    | Pancreas      | 85.7              | PSN-1      | Pancreas      | 50.5              |
| KMP2       | Pancreas      | 85.6              | U20S       | Sarcoma       | 50.0              |
| HPAF- II   | Pancreas      | 85.3              | CFPAC-1    | Pancreas      | 49.8              |
| KNS-81     | Glioblastoma  | 84.9              | U-87MG     | Glioblastoma  | 48.5              |
| TCO-1      | Thyroid       | 84.8              | GOTO       | Neuroblastoma | 48.3              |
| G361 mel   | Melanoma      | 83.6              | HepG2      | Liver         | 48.3              |
| QGP-1      | Pancreas      | 81.2              | YKG-1      | Glioblastoma  | 47.3              |
| 883 mel    | Melanoma      | 80.0              | SK MEL 2   | Melanoma      | 47.1              |
| HTC C3     | Thyroid       | 80.0              | A375 mel   | Melanoma      | 45.9              |
| U-251MG    | Glioblastoma  | 79.9              | 8505c      | Thyroid       | 45.4              |
| KP3        | Pancreas      | 79.6              | FRO        | Thyroid       | 44.3              |
| PK59       | Pancreas      | 79.5              | 533B mel   | Melanoma      | 43.9              |
| SW1990     | Pancreas      | 79.0              | 624 mel    | Melanoma      | 43.2              |
| AsPC-1     | Pancreas      | 78.2              | 1011 mel   | Melanoma      | 42.9              |
| NMC-G1     | Glioblastoma  | 77.7              | U-373-MG   | Glioblastoma  | 42.1              |
| RT4        | Bladder       | 76.9              | BxPC-3     | Pancreas      | 41.7              |
| KMP5       | Pancreas      | 74.8              | KMP3       | Pancreas      | 41.6              |
| WM115 mel  | Melanoma      | 74.2              | KMP4       | Pancreas      | 40.3              |
| CAPAB-2    | Pancreas      | 74.2              | MDA-MB-231 | Breast        | 39.3              |
| NUGC4      | Gastric       | 74.1              | 537 mel    | Melanoma      | 38.5              |
| HPC-Y0     | Pancreas      | 72.9              | 501 mel    | Melanoma      | 38.5              |
| KP4        | Pancreas      | 72.6              | 1102 mel   | Melanoma      | 38.3              |
| KALS-1     | Glioblastoma  | 72.2              | KHM-5M     | Thyroid       | 36.4              |
| GAK        | Melanoma      | 71.3              | Huh7       | Liver         | 35.9              |
| Hs 766T    | Pancreas      | 71.0              | HT144 mel  | Melanoma      | 34.8              |
| HT29       | Colon         | 71.0              | 952 mel    | Melanoma      | 34.3              |
| ASH-3      | Thyroid       | 70.4              | RT112      | Bladder       | 34.3              |
| GB-1       | Glioblastoma  | 68.6              | KTA-4      | Thyroid       | 32.7              |
| HPC-Y3     | Pancreas      | 68.0              | 729 mel    | Melanoma      | 32.2              |
| KTA-1      | Thyroid       | 67.5              | C32 mel    | Melanoma      | 31.4              |
| 526 mel    | Melanoma      | 66.8              | WM266 mel  | Melanoma      | 29.5              |
| 397 mel    | Melanoma      | 66.4              | 798 mel    | Melanoma      | 28.6              |
| RT-BMV-C6  | Neuroblastoma | 65.7              | HS 294T    | Melanoma      | 28.1              |
| TTA-3      | Thyroid       | 65.2              | A2058      | Melanoma      | 26.0              |
| TTA-1      | Thyroid       | 64.6              | KNS-60     | Glioblastoma  | 25.6              |
| PH61N      | Pancreas      | 64.5              | KM-H2      | Thyroid       | 24.2              |
| AGS        | Gastric       | 63.7              | HCT116     | Colon         | 21.7              |
| ARO        | Thyroid       | 63.1              | Marcus     | Glioblastoma  | 21.6              |
| A172       | Glioblastoma  | 63.1              | SK MEL 23  | Melanoma      | 21.1              |
| AM-38      | Glioblastoma  | 62.4              | KS-1       | Glioblastoma  | 20.0              |
| MMG1       | Melanoma      | 62.2              | RPMI 7951  | Melanoma      | 19.2              |
| T98G       | Glioblastoma  | 61.9              | 8305c      | Thyroid       | 18.8              |
| SK MEL 28  | Melanoma      | 61.3              | SF126      | Glioblastoma  | 15.8              |
| KP1N       | Pancreas      | 58.8              | 731 mel    | Melanoma      | 14.2              |
| HMV-II     | Melanoma      | 57.9              | HSC44PE    | Gastric       | 13.4              |
| HMV-I      | Melanoma      | 57.4              | SJ-N-CG    | Neuroblastoma | 6.7               |
| SK MEL 5   | Melanoma      | 56.3              | 888 mel    | Melanoma      | 6.5               |
| 928 mel    | Melanoma      | 56.2              |            |               |                   |

**Table S2 Characterization of *miRNA* -LNPs**

|                                      | <i>miR-NC</i>  | <i>miR-634</i> |
|--------------------------------------|----------------|----------------|
| <b>Average diameter (nm)</b>         | <b>49</b>      | <b>48</b>      |
| <b>Polydispersity index (PDI)</b>    | <b>0.05</b>    | <b>0.05</b>    |
| <b>Encapsulation efficiency (EE)</b> | <b>&gt;90%</b> | <b>&gt;90%</b> |
